# Supplementary figures and images for: Gut microbial metabolite urolithin B attenuates intestinal immunity functionin vivoin aging mice andin vitroin HT29 cells by regulating oxidative stress and inflammatory signalling
Source: Royal Society of Chemistry journal article supplement (doi:10.1039/d1fo02440j), 2021-01-01

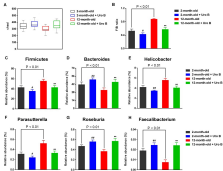

Supplement: d1fo02440j3.pdf [file d1fo02440j3.pdf]
